# Supplementary material for: Biodegradation of HA and β-TCP Ceramics Regulated by T-Cells
Source: MDPI journal article supplement (doi:10.3390/pharmaceutics14091962), 2022-09-16
Supplement: s1 [file s1]

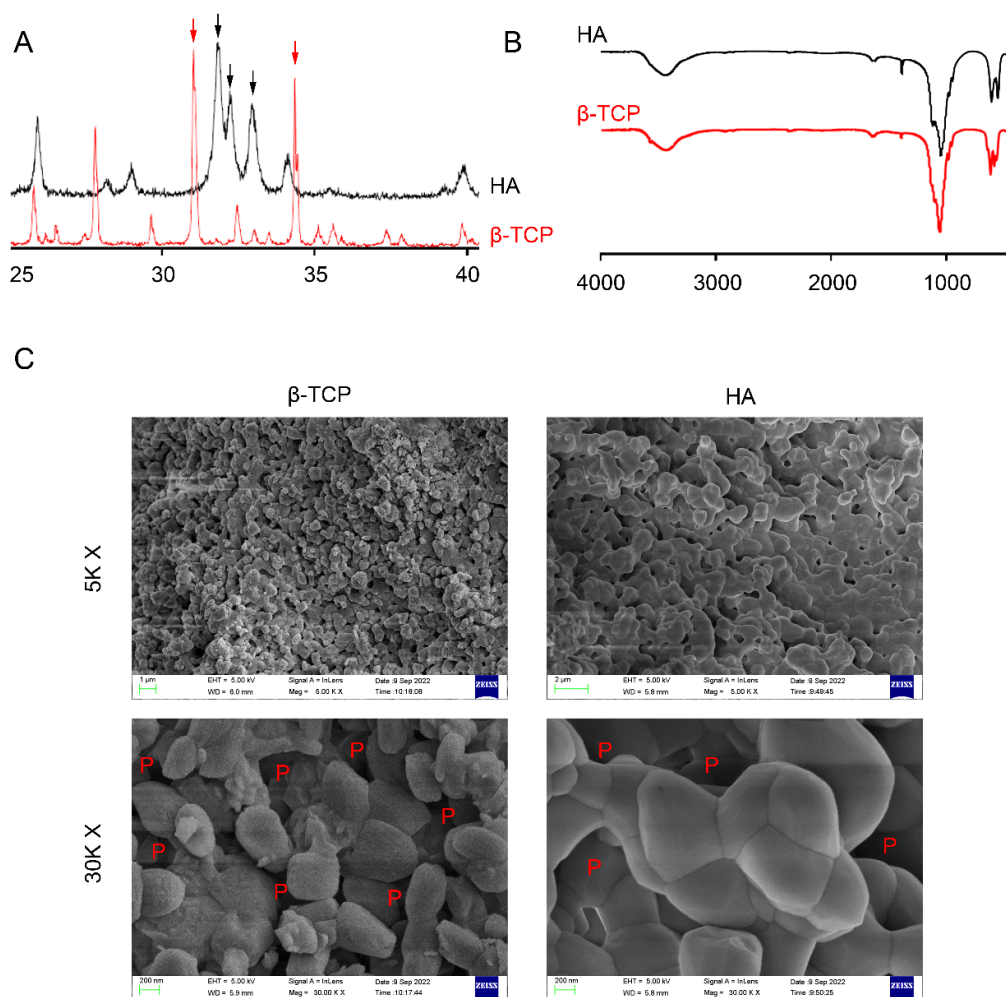

**Supplementary Figure S1.** Characterization of  $\beta$ -TCP and HA. (A) X-ray diffraction (XRD) of  $\beta$ -TCP (red) and HA (black). The characteristic peak marked by arrows. (B) Fourier transform infrared spectroscopy (FTIR) of  $\beta$ -TCP (red) and HA (black). (C) Scanning electron microscopy (SEM) of  $\beta$ -TCP and HA. "P" stands for pores.
